# Supplementary material for: Performing a shortened version of the Action Research Arm Test in immersive virtual reality to assess post-stroke upper limb activity
Source: PubMed Central journal article supplement (PMC9719653; doi:10.1186/s12984-022-01114-3), 2022-12-03
Supplement: 12984_2022_1114_MOESM3_ESM.pdf [file 12984_2022_1114_MOESM3_ESM.pdf]

# ARAT-VR Questionnaire

## Information :

Name : .....

Dominant hand : L / R

First Name : .....

Weight (kg) : .....

Date of birth : ..... / .... / .....

Height (cm) : .....

E-mail : .....

---

## Hand used : L / R

### **1. ARAT-VR vs ARAT**

For each item and for each movement, please compare your impression regarding the difficulty between the ARAT-VR and the traditional ARAT according to the scale described below

**-2** : Much easier when performed during the ARAT-VR than traditional ARAT

**-1** : Easier when performed during the ARAT-VR than traditional ARAT

**0** : No difference

**1** : More difficult when performed during the ARAT-VR than traditional ARAT

**2** : Much more difficult when performed during the ARAT-VR than traditional ARAT

**Grasp :**

**Cube - 10 cm**

Hand's opening movement to grasp the cube

|    |    |   |   |   |
|----|----|---|---|---|
| -2 | -1 | 0 | 1 | 2 |
|----|----|---|---|---|

Hand's closing movement to grasp the cube

|    |    |   |   |   |
|----|----|---|---|---|
| -2 | -1 | 0 | 1 | 2 |
|----|----|---|---|---|

Object maintaining during the cube displacement

|    |    |   |   |   |
|----|----|---|---|---|
| -2 | -1 | 0 | 1 | 2 |
|----|----|---|---|---|

Shoulder flexion while putting the cube on a height

|    |    |   |   |   |
|----|----|---|---|---|
| -2 | -1 | 0 | 1 | 2 |
|----|----|---|---|---|

Hand's opening movement to release the cube

|    |    |   |   |   |
|----|----|---|---|---|
| -2 | -1 | 0 | 1 | 2 |
|----|----|---|---|---|

➤ Justification :

.....  
.....  
.....

**Cube - 2.5 cm**

Hand's opening movement to grasp the cube

|    |    |   |   |   |
|----|----|---|---|---|
| -2 | -1 | 0 | 1 | 2 |
|----|----|---|---|---|

Hand's closing movement to grasp the cube

|    |    |   |   |   |
|----|----|---|---|---|
| -2 | -1 | 0 | 1 | 2 |
|----|----|---|---|---|

Object maintaining during the cube displacement

|    |    |   |   |   |
|----|----|---|---|---|
| -2 | -1 | 0 | 1 | 2 |
|----|----|---|---|---|

Shoulder flexion while putting the cube on a height

|    |    |   |   |   |
|----|----|---|---|---|
| -2 | -1 | 0 | 1 | 2 |
|----|----|---|---|---|

Hand's opening movement to release the cube

|    |    |   |   |   |
|----|----|---|---|---|
| -2 | -1 | 0 | 1 | 2 |
|----|----|---|---|---|

➤ Justification :

.....  
.....  
.....

**Cube - 5 cm**

Hand's opening movement to grasp the cube

|    |    |   |   |   |
|----|----|---|---|---|
| -2 | -1 | 0 | 1 | 2 |
|----|----|---|---|---|

Hand's closing movement to grasp the cube

|    |    |   |   |   |
|----|----|---|---|---|
| -2 | -1 | 0 | 1 | 2 |
|----|----|---|---|---|

Object maintaining during the cube displacement

|    |    |   |   |   |
|----|----|---|---|---|
| -2 | -1 | 0 | 1 | 2 |
|----|----|---|---|---|

Shoulder flexion while putting the cube on a height

|    |    |   |   |   |
|----|----|---|---|---|
| -2 | -1 | 0 | 1 | 2 |
|----|----|---|---|---|

Hand's opening movement to release the cube

|    |    |   |   |   |
|----|----|---|---|---|
| -2 | -1 | 0 | 1 | 2 |
|----|----|---|---|---|

➤ Justification :

.....

.....

.....

**Cube - 7.5 cm**

Hand's opening movement to grasp the cube

|    |    |   |   |   |
|----|----|---|---|---|
| -2 | -1 | 0 | 1 | 2 |
|----|----|---|---|---|

Hand's closing movement to grasp the cube

|    |    |   |   |   |
|----|----|---|---|---|
| -2 | -1 | 0 | 1 | 2 |
|----|----|---|---|---|

Object maintaining during the cube displacement

|    |    |   |   |   |
|----|----|---|---|---|
| -2 | -1 | 0 | 1 | 2 |
|----|----|---|---|---|

Shoulder flexion while putting the cube on a height

|    |    |   |   |   |
|----|----|---|---|---|
| -2 | -1 | 0 | 1 | 2 |
|----|----|---|---|---|

Hand's opening movement to release the cube

|    |    |   |   |   |
|----|----|---|---|---|
| -2 | -1 | 0 | 1 | 2 |
|----|----|---|---|---|

➤ Justification :

.....  
.....  
.....

**Grip :**

Pouring the glass with a glass of water

Hand's opening movement to grasp the glass

|    |    |   |   |   |
|----|----|---|---|---|
| -2 | -1 | 0 | 1 | 2 |
|----|----|---|---|---|

Hand's closing movement to grasp the glass

|    |    |   |   |   |
|----|----|---|---|---|
| -2 | -1 | 0 | 1 | 2 |
|----|----|---|---|---|

Object maintaining during the glass displacement

|    |    |   |   |   |
|----|----|---|---|---|
| -2 | -1 | 0 | 1 | 2 |
|----|----|---|---|---|

Pronation movement needed to pour the empty glass

|    |    |   |   |   |
|----|----|---|---|---|
| -2 | -1 | 0 | 1 | 2 |
|----|----|---|---|---|

➤ Justification :

.....  
.....  
.....

**Tube - 2.25 cm**

Hand's opening movement to grasp the tube

|    |    |   |   |   |
|----|----|---|---|---|
| -2 | -1 | 0 | 1 | 2 |
|----|----|---|---|---|

Hand's closing movement to grasp the tube

|    |    |   |   |   |
|----|----|---|---|---|
| -2 | -1 | 0 | 1 | 2 |
|----|----|---|---|---|

Approach/reaching movement (maintaining)

|    |    |   |   |   |
|----|----|---|---|---|
| -2 | -1 | 0 | 1 | 2 |
|----|----|---|---|---|

Pulling on the tube

|    |    |   |   |   |
|----|----|---|---|---|
| -2 | -1 | 0 | 1 | 2 |
|----|----|---|---|---|

➤ Justification :

.....  
.....  
.....

**Tube - 1 cm**

Hand's opening movement to grasp the tube

|    |    |   |   |   |
|----|----|---|---|---|
| -2 | -1 | 0 | 1 | 2 |
|----|----|---|---|---|

Hand's closing movement to grasp the tube

|    |    |   |   |   |
|----|----|---|---|---|
| -2 | -1 | 0 | 1 | 2 |
|----|----|---|---|---|

Approach/reaching movement (maintaining)

|    |    |   |   |   |
|----|----|---|---|---|
| -2 | -1 | 0 | 1 | 2 |
|----|----|---|---|---|

Pulling on the tube

|    |    |   |   |   |
|----|----|---|---|---|
| -2 | -1 | 0 | 1 | 2 |
|----|----|---|---|---|

➤ Justification :

.....

.....

.....



## Ring

Hand's opening movement to grasp the ring

|    |    |   |   |   |
|----|----|---|---|---|
| -2 | -1 | 0 | 1 | 2 |
|----|----|---|---|---|

Hand's closing movement to grasp the ring

|    |    |   |   |   |
|----|----|---|---|---|
| -2 | -1 | 0 | 1 | 2 |
|----|----|---|---|---|

Approach/reaching movement (maintaining)

|    |    |   |   |   |
|----|----|---|---|---|
| -2 | -1 | 0 | 1 | 2 |
|----|----|---|---|---|

Pulling on the ring

|    |    |   |   |   |
|----|----|---|---|---|
| -2 | -1 | 0 | 1 | 2 |
|----|----|---|---|---|

➤ Justification :

.....

.....

.....

**Pinch :**

**Thumb-ring finger**

Pinching movement

|    |    |   |   |   |
|----|----|---|---|---|
| -2 | -1 | 0 | 1 | 2 |
|----|----|---|---|---|

Object maintaining during the displacement of the marble

|    |    |   |   |   |
|----|----|---|---|---|
| -2 | -1 | 0 | 1 | 2 |
|----|----|---|---|---|

Shoulder flexion while putting the marble on a height

|    |    |   |   |   |
|----|----|---|---|---|
| -2 | -1 | 0 | 1 | 2 |
|----|----|---|---|---|

➤ Justification :

.....

.....

.....

## Thumb-index

Pinching movement

|    |    |   |   |   |
|----|----|---|---|---|
| -2 | -1 | 0 | 1 | 2 |
|----|----|---|---|---|

Object maintaining during the displacement of the marble

|    |    |   |   |   |
|----|----|---|---|---|
| -2 | -1 | 0 | 1 | 2 |
|----|----|---|---|---|

Shoulder flexion while putting the marble on a height

|    |    |   |   |   |
|----|----|---|---|---|
| -2 | -1 | 0 | 1 | 2 |
|----|----|---|---|---|

➤ Justification :

.....

.....

.....

**Thumb-middle finger**

Pinching movement

|    |    |   |   |   |
|----|----|---|---|---|
| -2 | -1 | 0 | 1 | 2 |
|----|----|---|---|---|

Object maintaining during the displacement of the marble

|    |    |   |   |   |
|----|----|---|---|---|
| -2 | -1 | 0 | 1 | 2 |
|----|----|---|---|---|

Shoulder flexion while putting the marble on a height

|    |    |   |   |   |
|----|----|---|---|---|
| -2 | -1 | 0 | 1 | 2 |
|----|----|---|---|---|

➤ Justification :

.....

.....

.....

**Gross movement :**

**Touching the top of the head**

|    |    |   |   |   |
|----|----|---|---|---|
| -2 | -1 | 0 | 1 | 2 |
|----|----|---|---|---|

➤ Justification :

.....  
.....  
.....

**Touching the mouth**

|    |    |   |   |   |
|----|----|---|---|---|
| -2 | -1 | 0 | 1 | 2 |
|----|----|---|---|---|

➤ Justification :

.....  
.....  
.....

## **General appreciation**

On a scale ranging from 1 to 5, where 1 is poor and 5 perfect, could you evaluate the following features of the ARAT-VR :

### **Ergonomics of the application**

|   |   |   |   |   |
|---|---|---|---|---|
| 1 | 2 | 3 | 4 | 5 |
|---|---|---|---|---|

➤ Justification :

.....  
.....  
.....

### **Clarity of instructions**

|   |   |   |   |   |
|---|---|---|---|---|
| 1 | 2 | 3 | 4 | 5 |
|---|---|---|---|---|

➤ Justification :

.....  
.....  
.....

---

**Thank you for your help !**
