# Supplementary material for: Performing a shortened version of the Action Research Arm Test in immersive virtual reality to assess post-stroke upper limb activity
Source: PubMed Central journal article supplement (PMC9719653; doi:10.1186/s12984-022-01114-3), 2022-12-03
Supplement: 12984_2022_1114_MOESM5_ESM.pdf [file 12984_2022_1114_MOESM5_ESM.pdf]

# Cube - 10cm

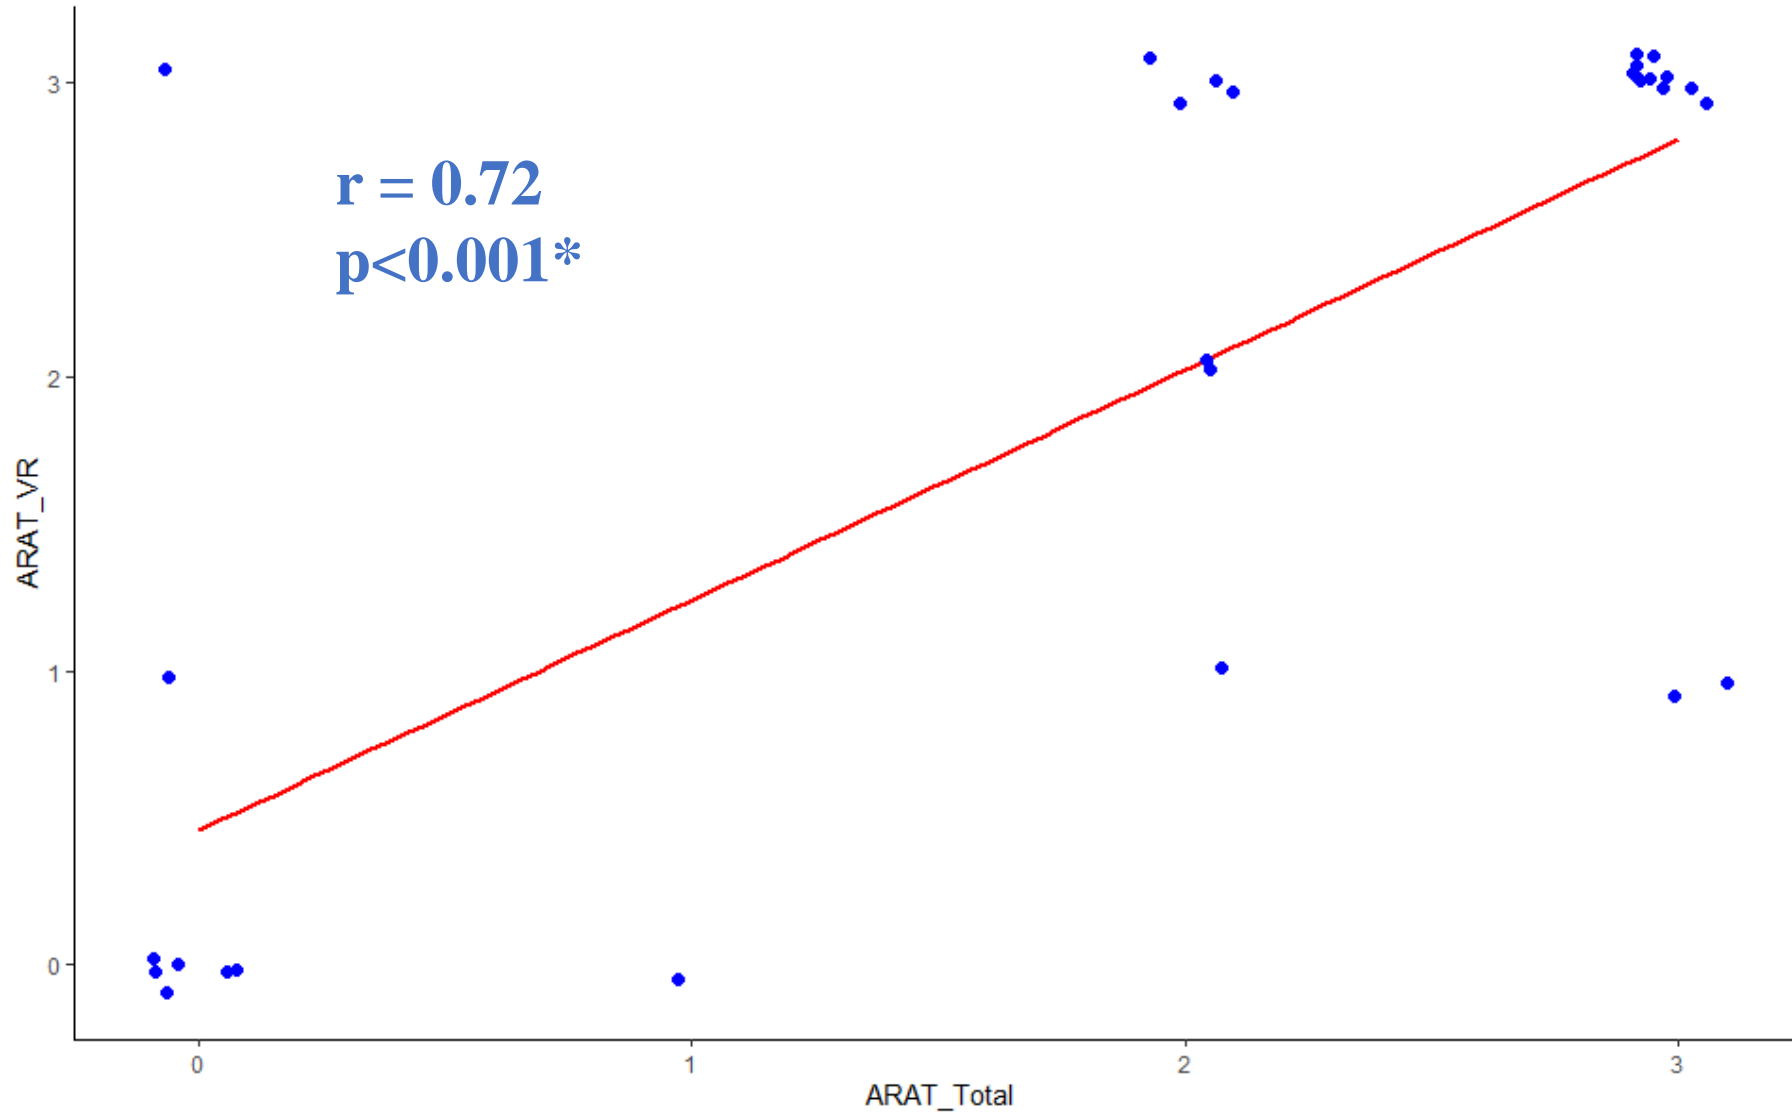

## Wilcoxon signed rank test

| ARAT_VR   | ARAT(/39) | p-value |
|-----------|-----------|---------|
| 3 [0 - 3] | 2 [0 - 3] | 0.846   |

# Cube - 2.5cm

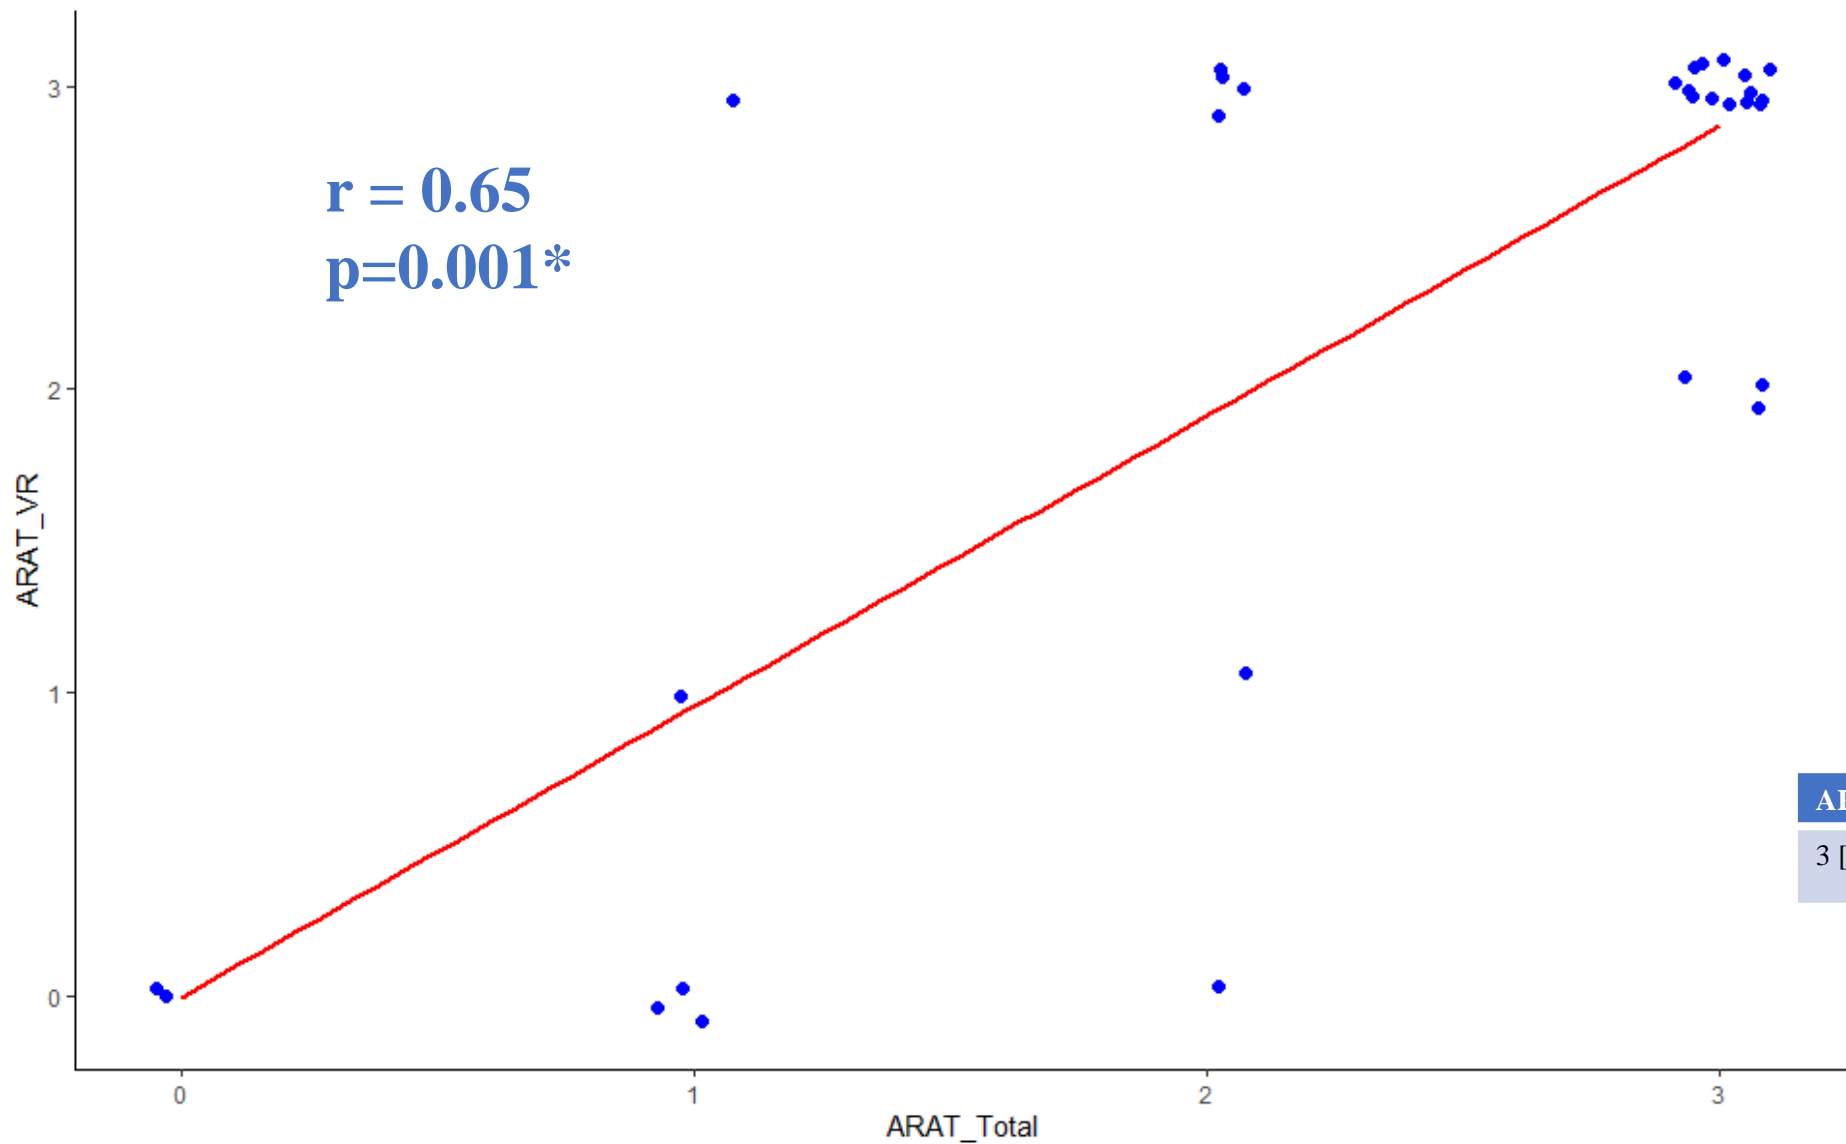

## Wilcoxon signed rank test

| ARAT_VR   | ARAT(/39)    | p-value |
|-----------|--------------|---------|
| 3 [1 - 3] | 3 [1.75 - 3] | 0.542   |

# Cube - 5cm

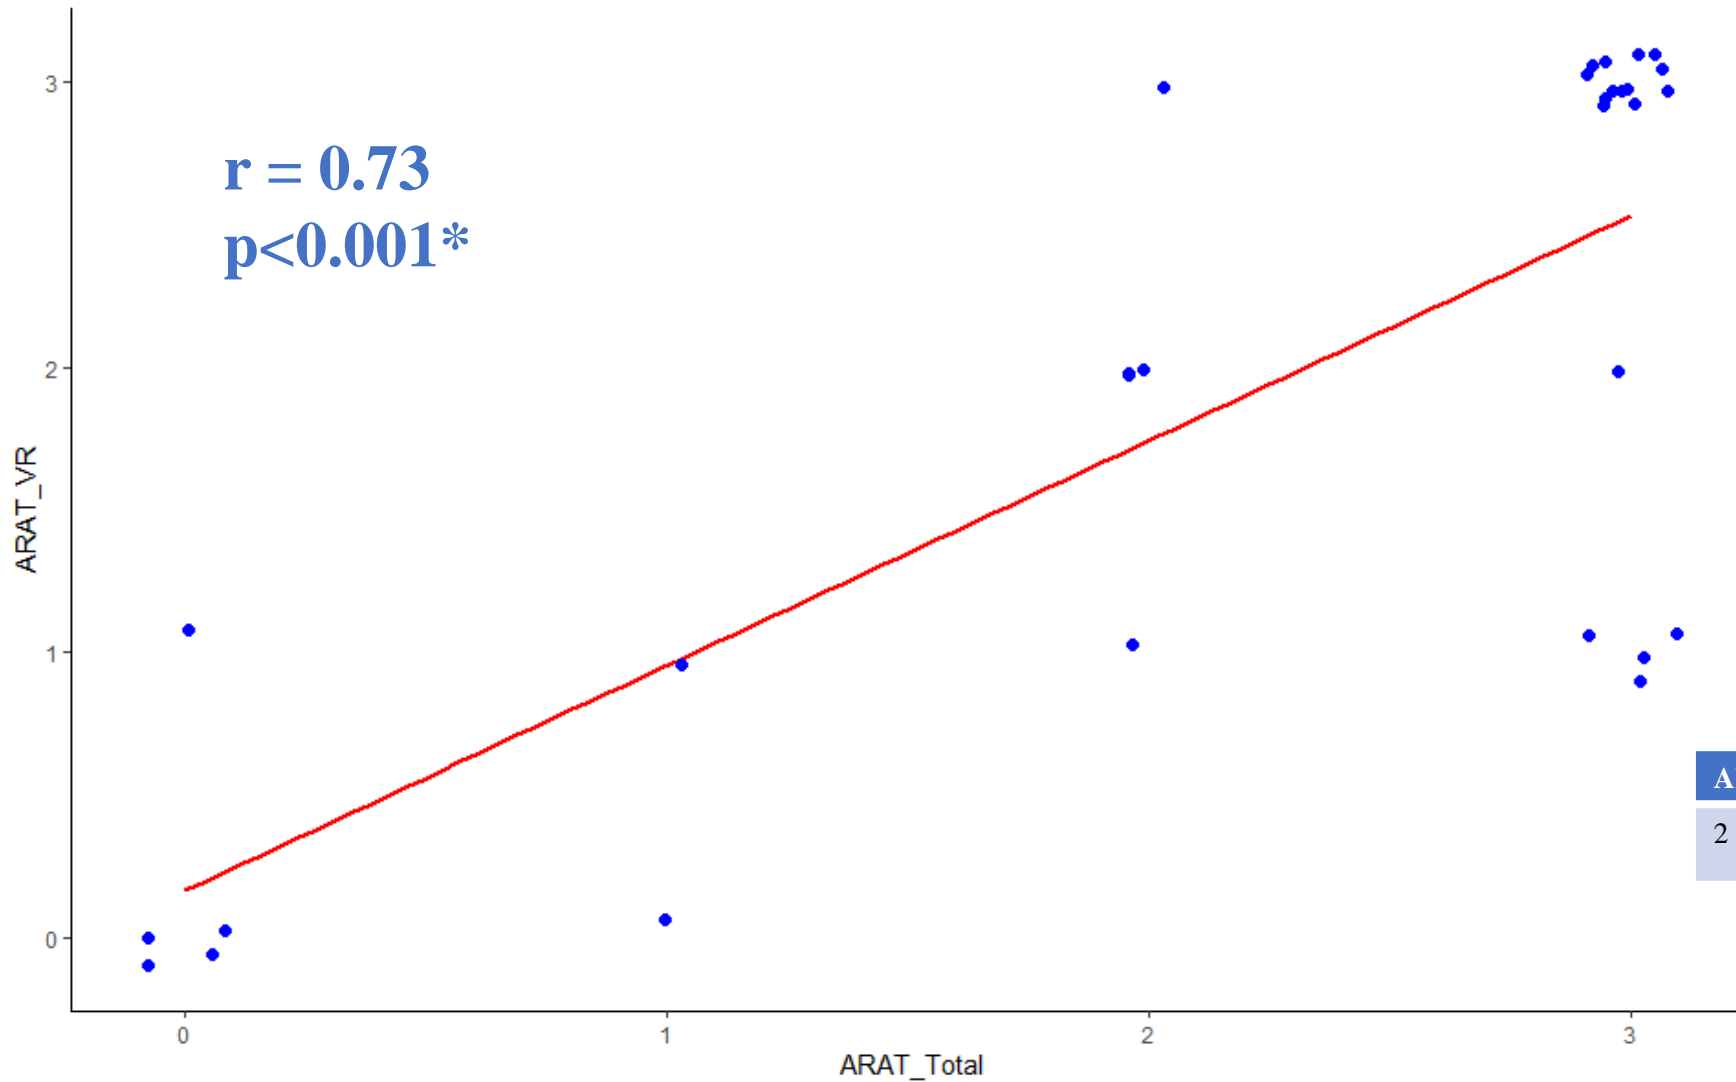

**Wilcoxon signed rank test**

| ARAT_VR   | ARAT(/39)    | p-value |
|-----------|--------------|---------|
| 2 [1 - 3] | 3 [1.75 - 3] | 0.055   |



# Glass of water

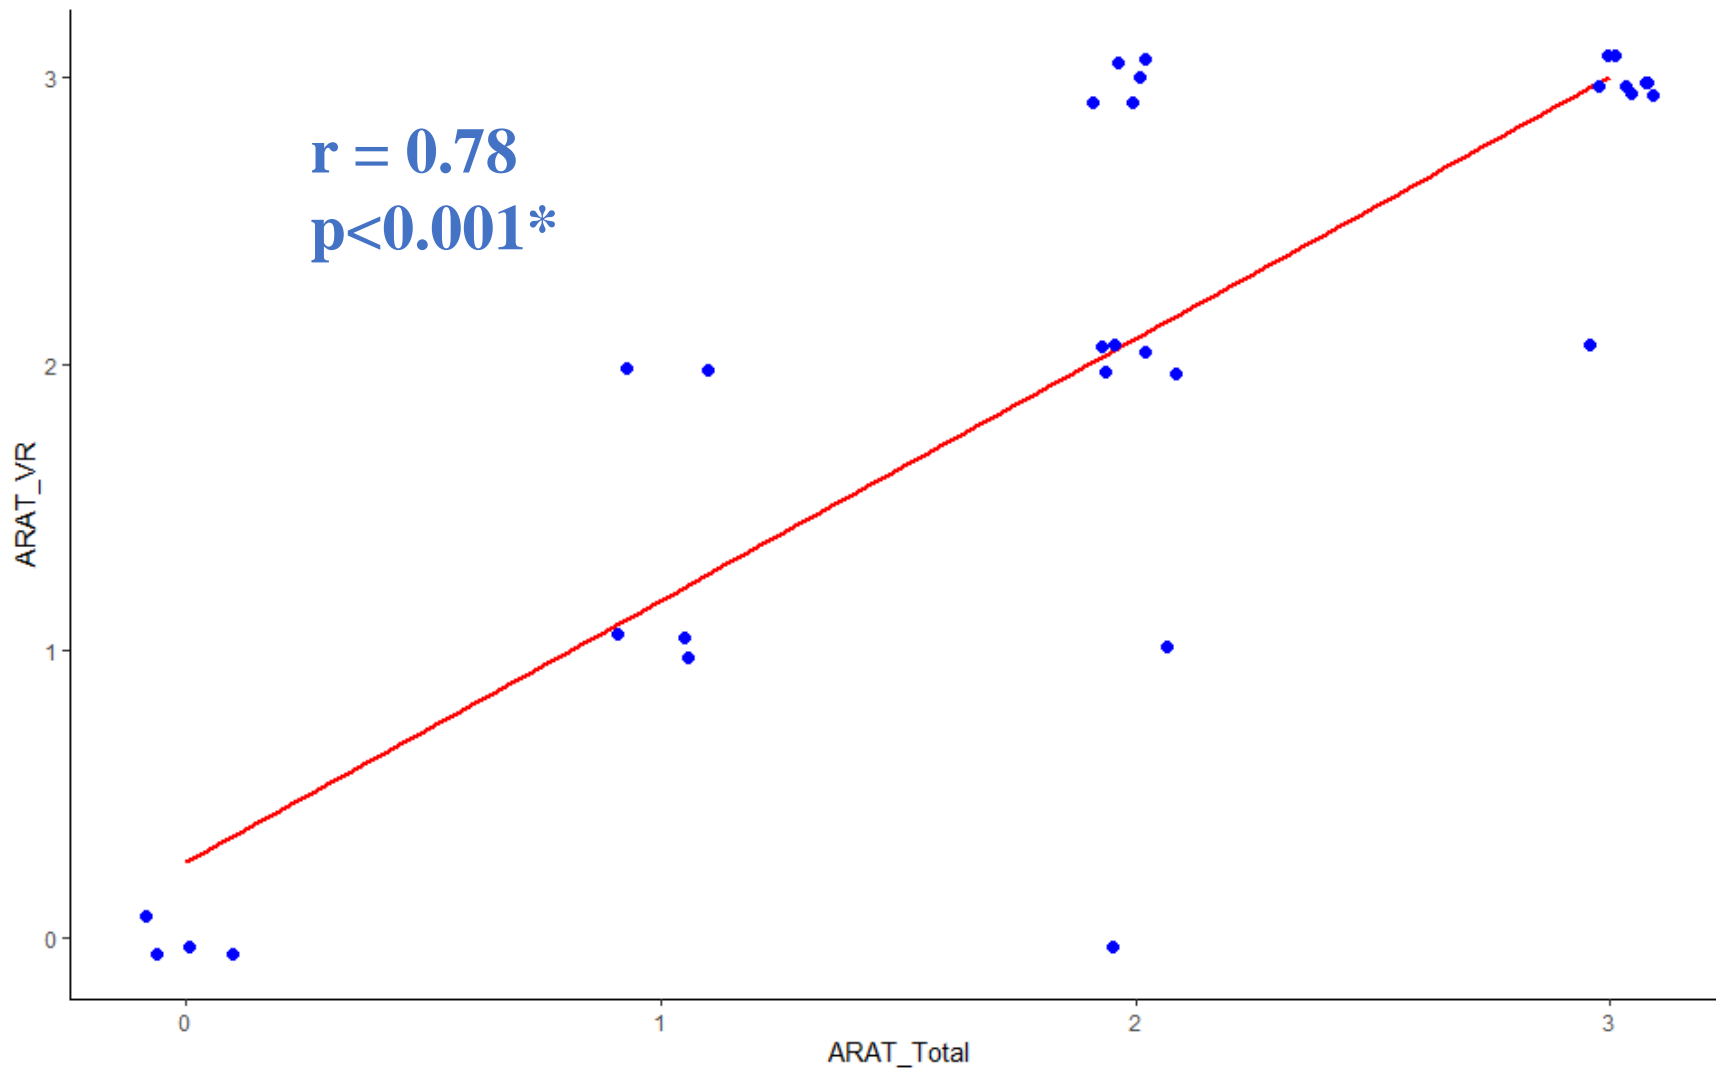

## Wilcoxon signed rank test

| ARAT_VR   | ARAT(/39) | p-value |
|-----------|-----------|---------|
| 2 [1 - 3] | 2 [1 - 3] | 0.492   |

# Tube – 2.25 cm

**$r = 0.85$**   
 **$p < 0.001^*$**

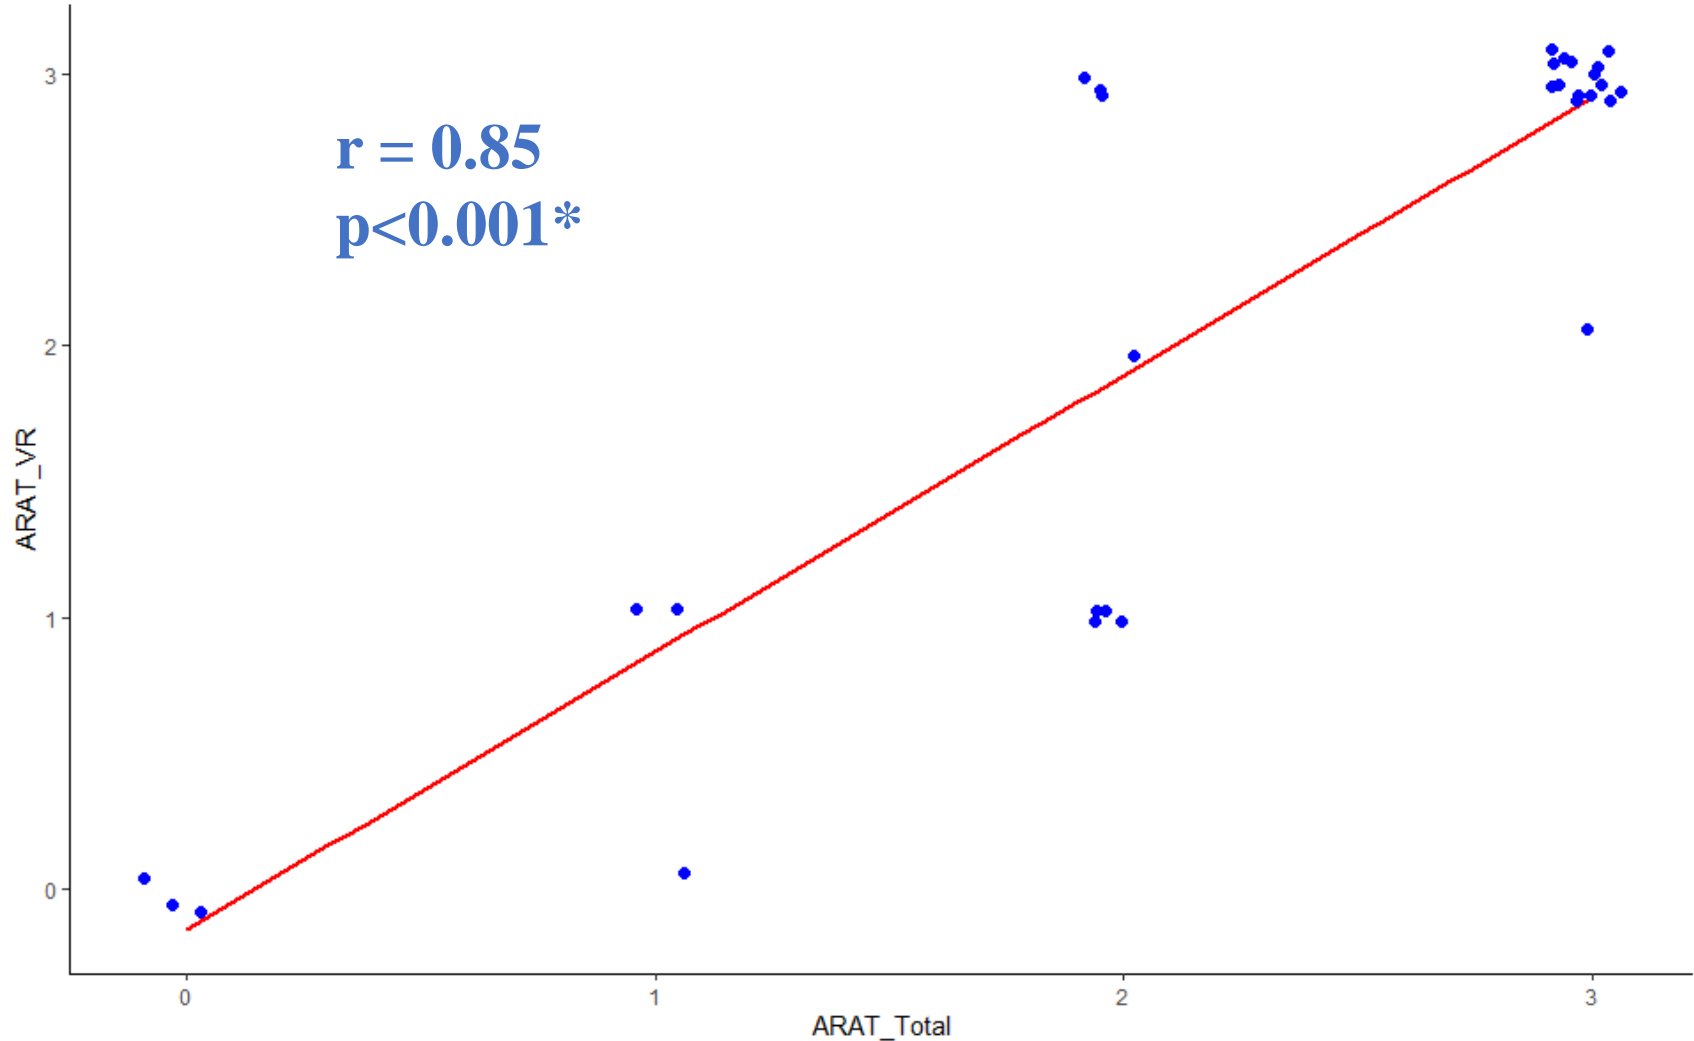

## **Wilcoxon signed rank test**

| <b>ARAT_VR</b> | <b>ARAT(/39)</b> | <b>p-value</b> |
|----------------|------------------|----------------|
| 3 [1 - 3]      | 3 [2 - 3]        | 0.426          |

# Tube – 1 cm

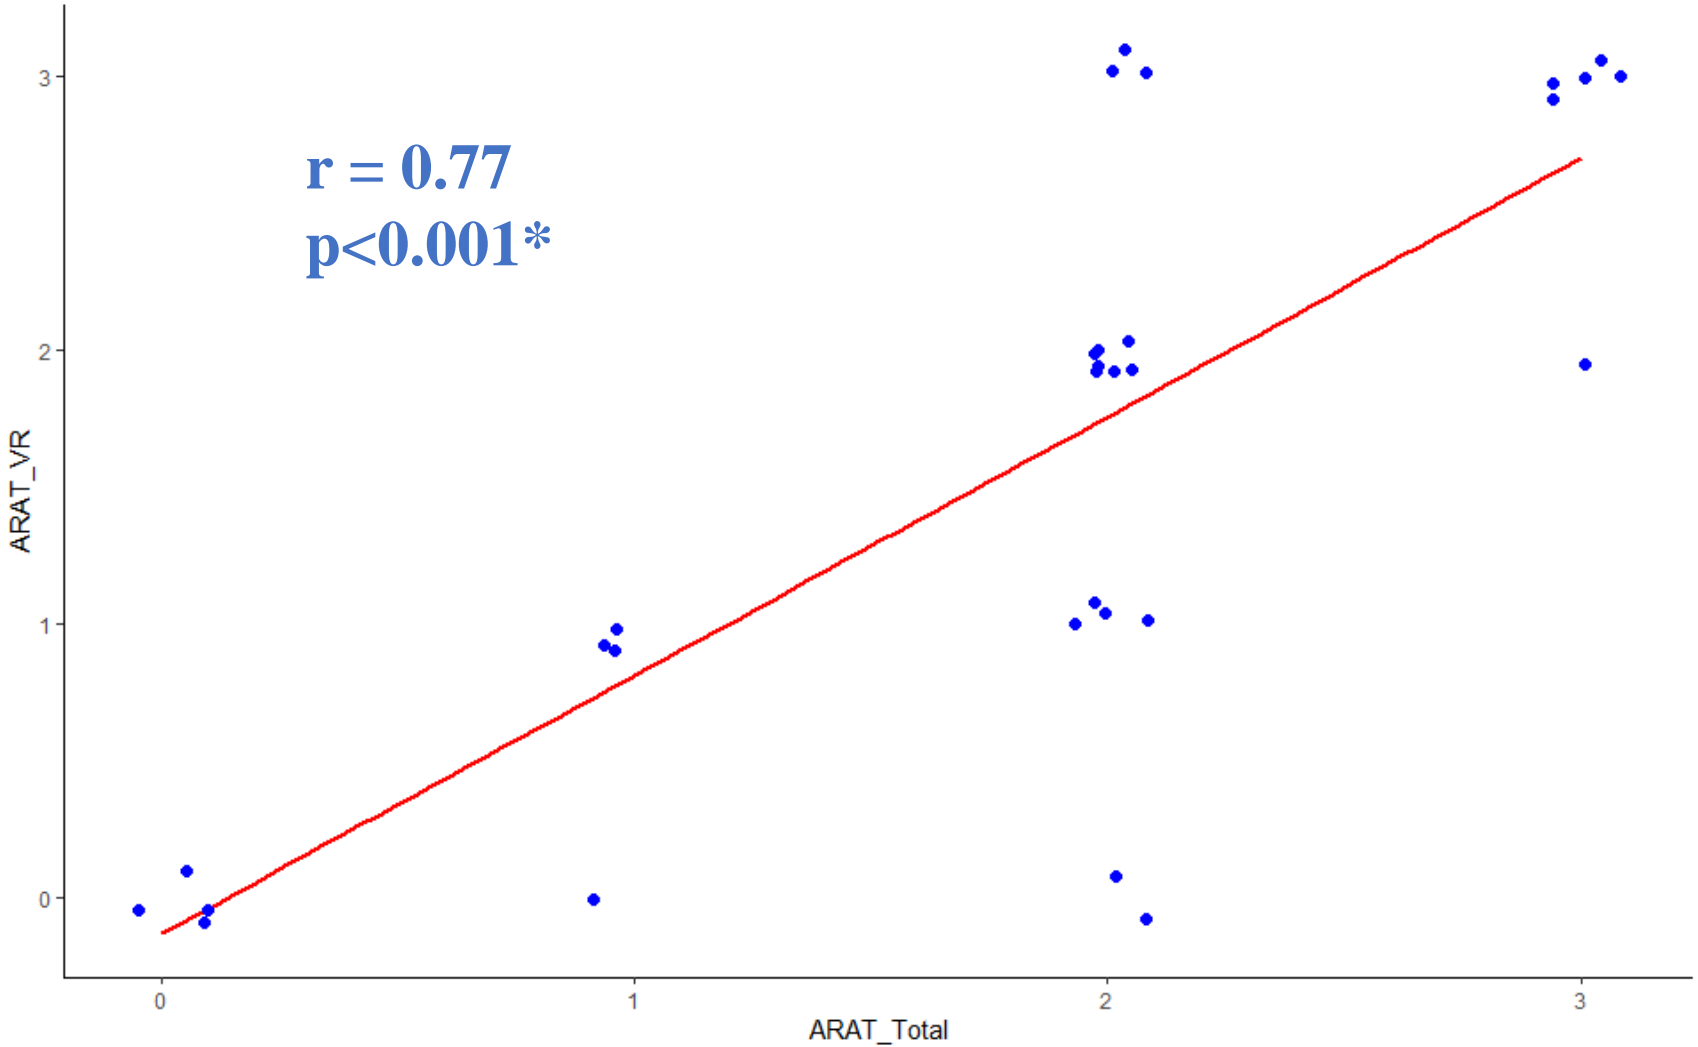

## Wilcoxon signed rank test

| ARAT_VR      | ARAT(/39) | p-value |
|--------------|-----------|---------|
| 2 [0.75 - 3] | 2 [1 - 2] | 0.123   |

# Ring

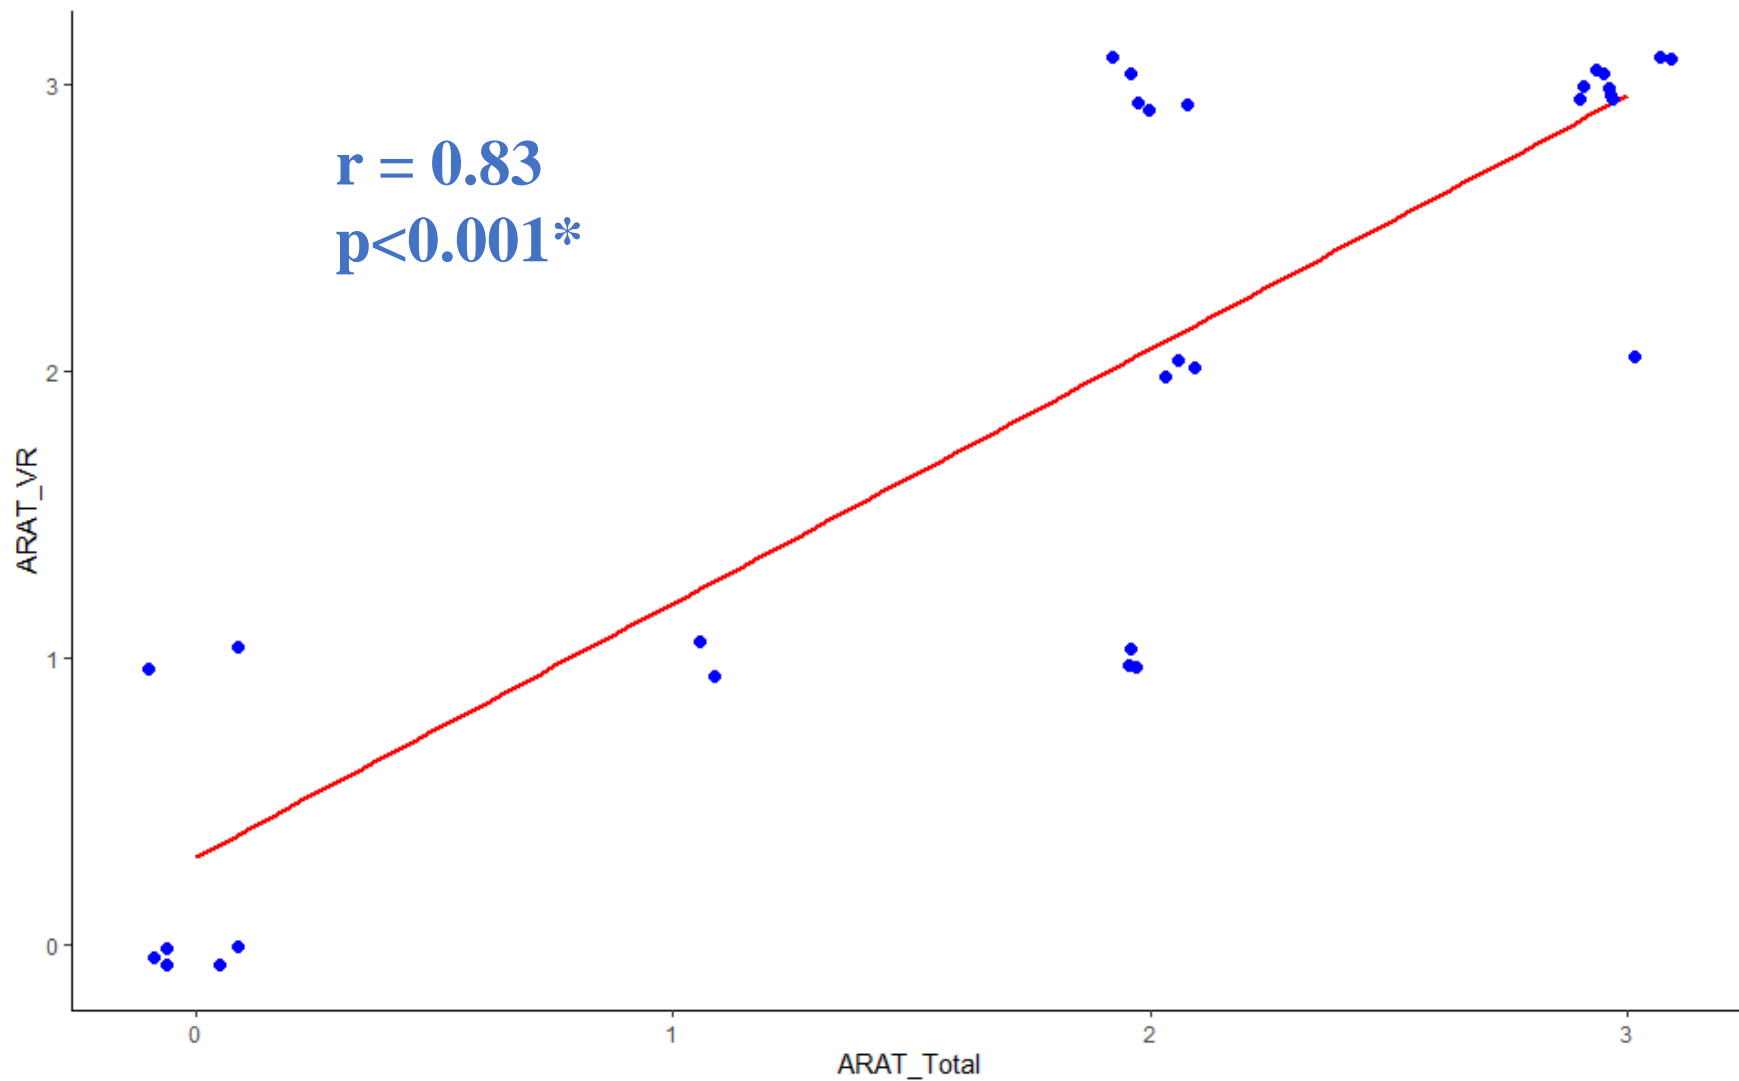

## Wilcoxon signed rank test

| ARAT_VR   | ARAT(/39)    | p-value |
|-----------|--------------|---------|
| 2 [1 - 3] | 2 [0.75 - 3] | 0.465   |



# Marble – thumb ring finger

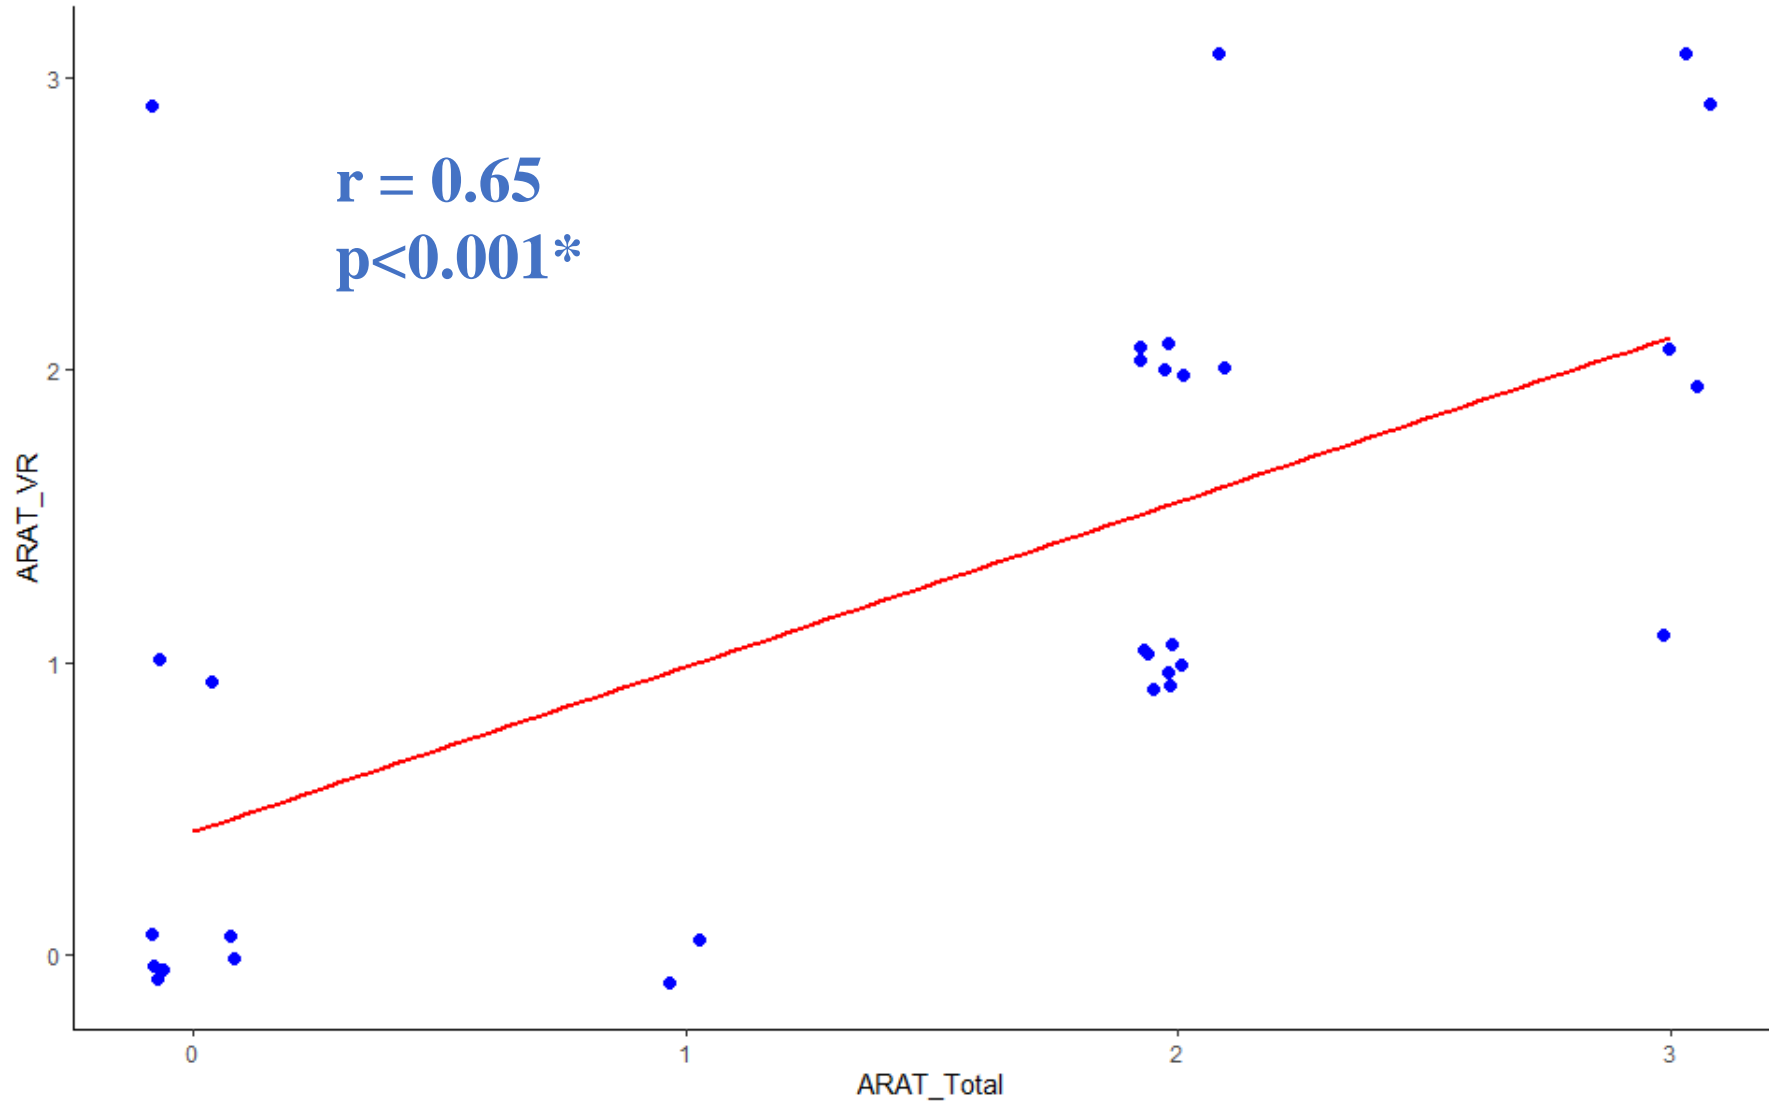

## Wilcoxon signed rank test

| ARAT_VR   | ARAT(/39) | p-value |
|-----------|-----------|---------|
| 1 [0 - 2] | 2 [0 - 2] | 0.130   |

# Marble – thumb-index

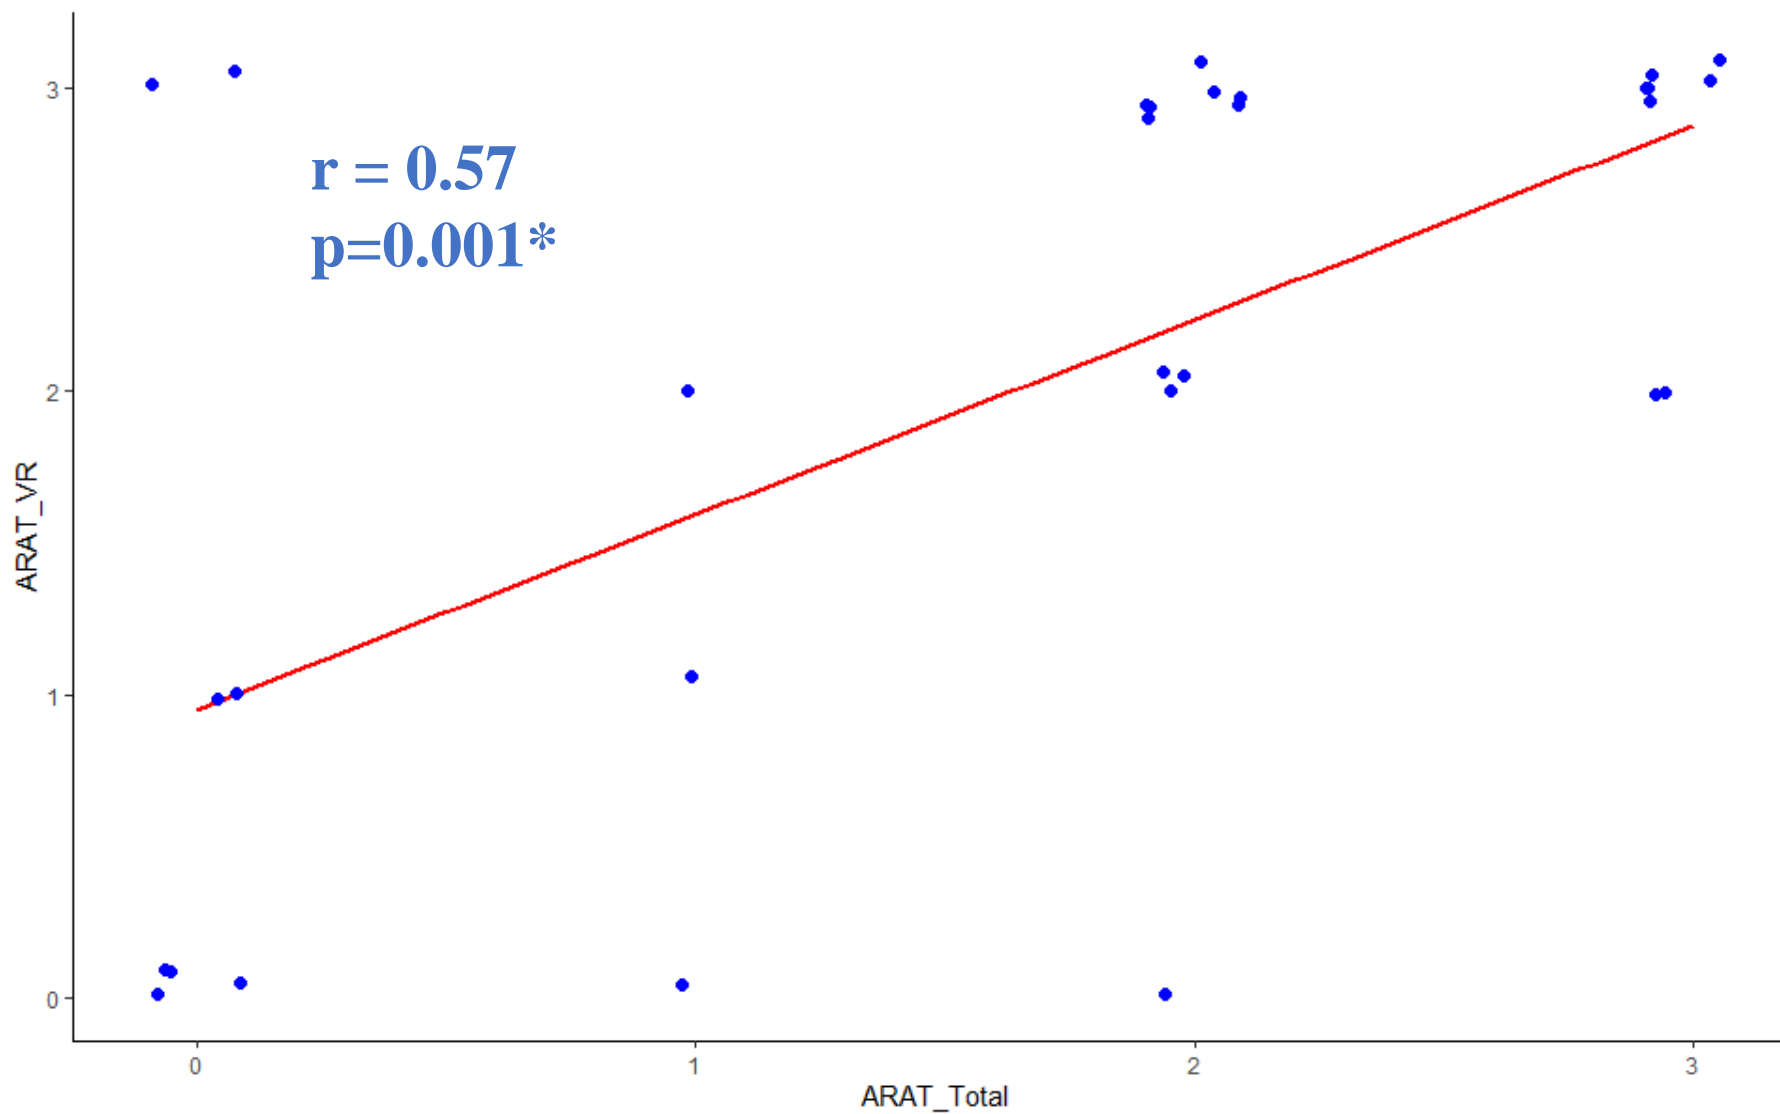

## Wilcoxon signed rank test

| ARAT_VR     | ARAT(/39) | p-value |
|-------------|-----------|---------|
| 2.5 [1 - 3] | 2 [0 - 3] | 0.093   |

# Marble – thumb-middle finger

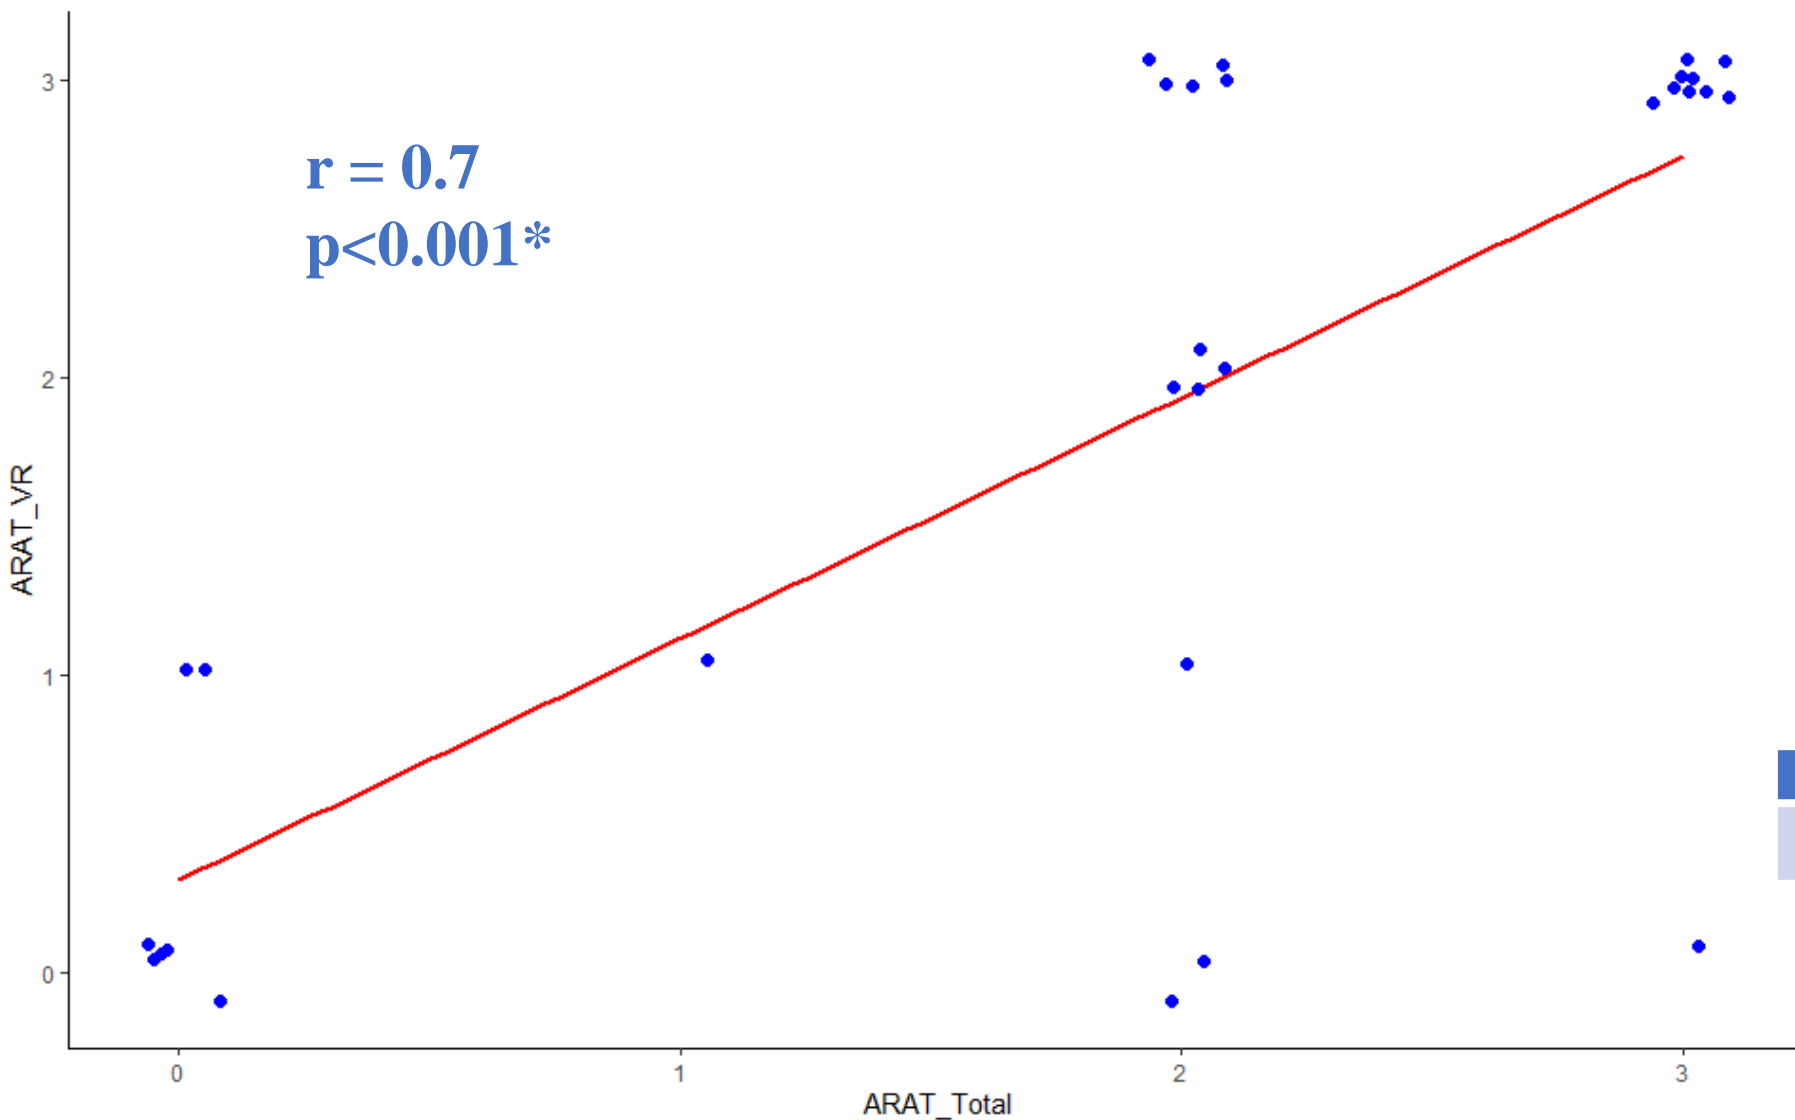

## Wilcoxon signed rank test

| ARAT_VR   | ARAT(/39)    | p-value |
|-----------|--------------|---------|
| 2 [0 - 3] | 2 [0.75 - 3] | 0.898   |

# Touching the head with the hand

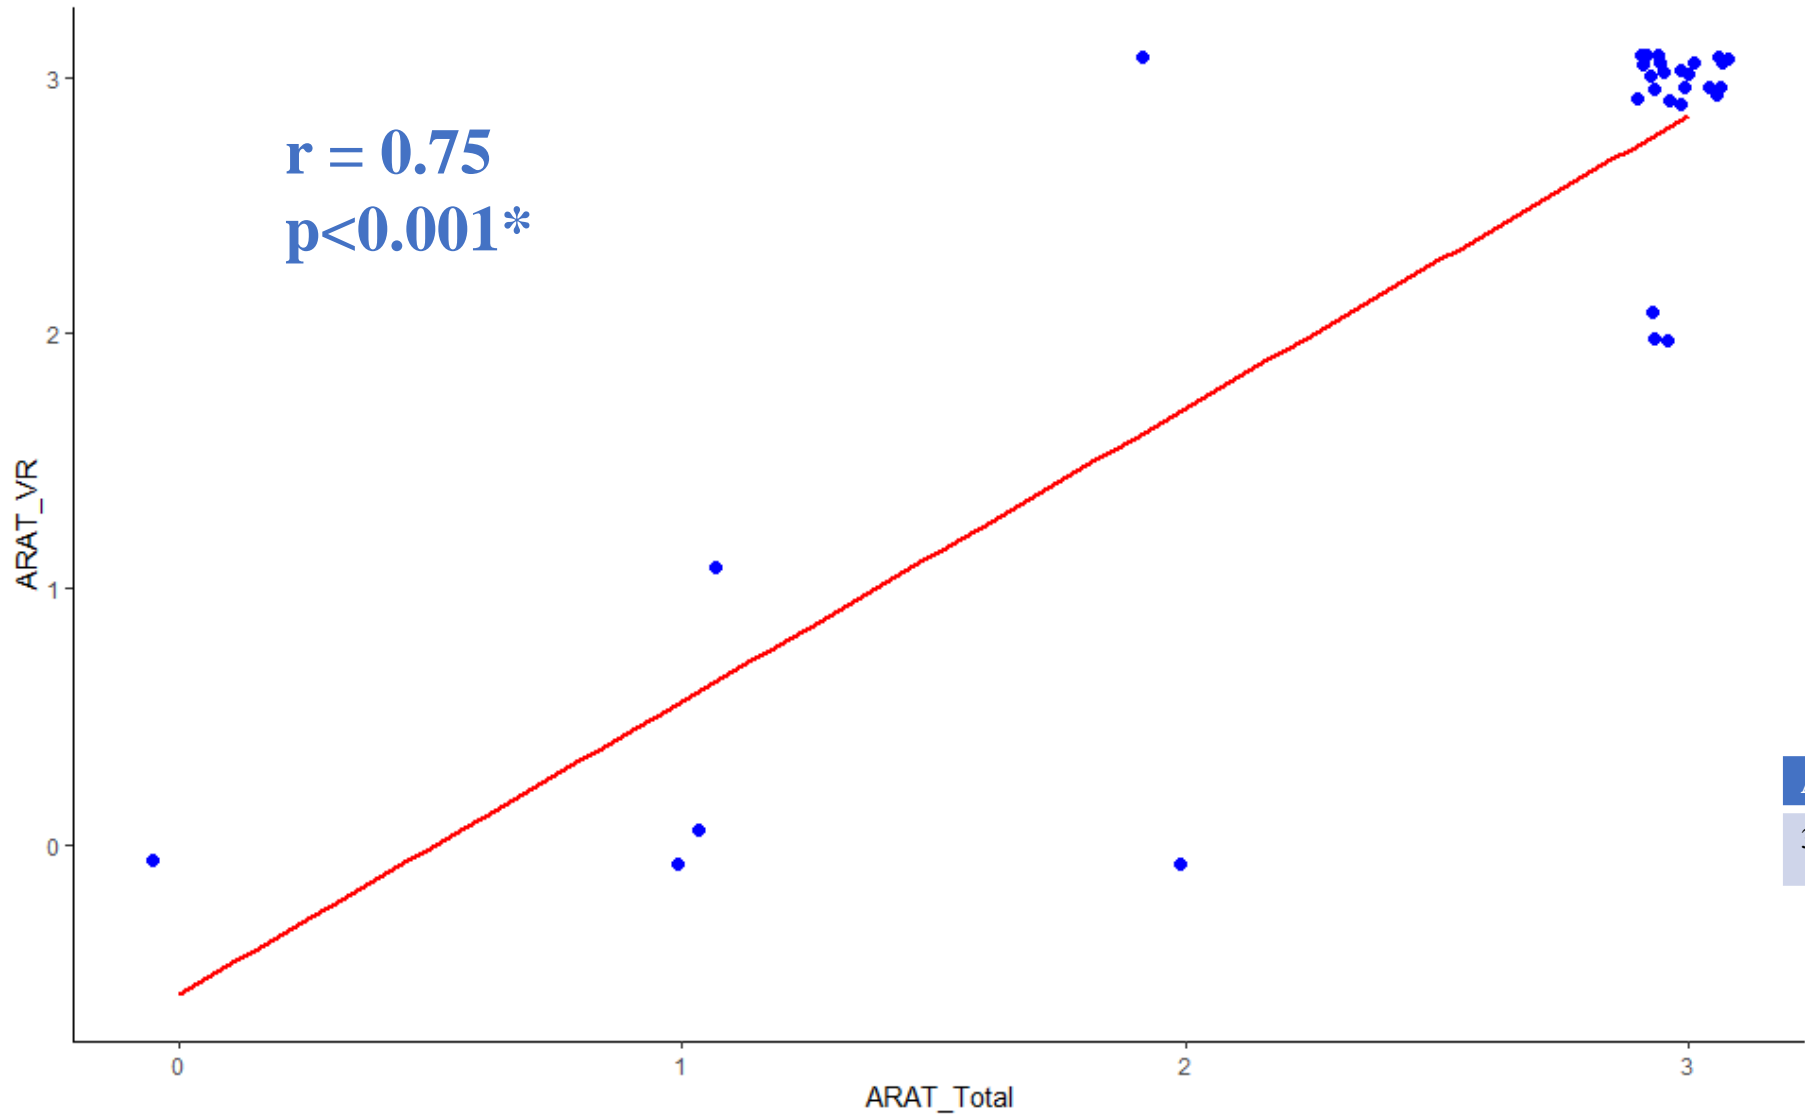

### Wilcoxon signed rank test

| ARAT_VR   | ARAT(/39) | p-value |
|-----------|-----------|---------|
| 3 [2 - 3] | 3 [3 - 3] | 0.08    |

# Touching the mouth with the hand

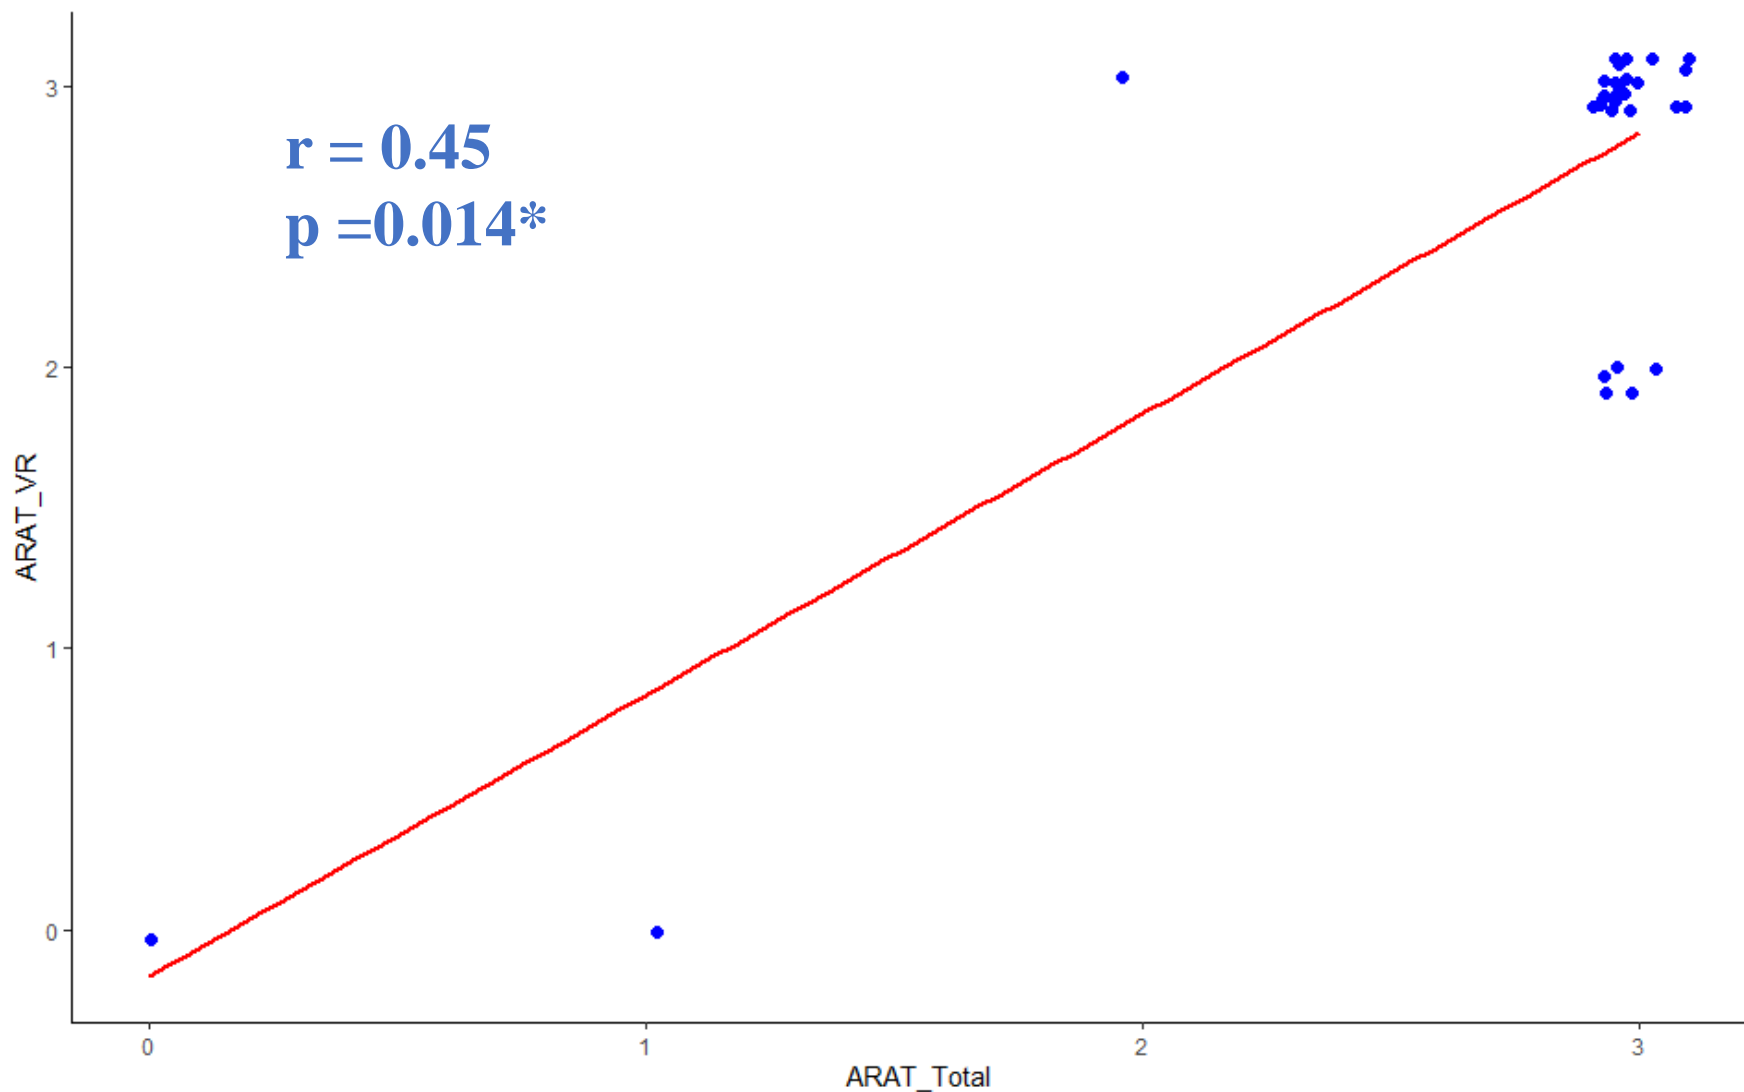

## Wilcoxon signed rank test

| ARAT_VR     | ARAT(/39) | p-value |
|-------------|-----------|---------|
| 3 [2.75- 3] | 3 [3 - 3] | 0.109   |
